# Supplementary material for: Quantifying the global burden of mental disorders and their economic value
Source: PubMed Central journal article supplement (PMC9526145; doi:10.1016/j.eclinm.2022.101675), 2022-09-28
Supplement: mmc1.pdf [file mmc1.pdf]

## Supplementary appendix

**Table S1. The global economic burden of mental disorders, by year and approach, calculated by Bloom and colleagues.<sup>1</sup> and adjusted to 2019 USD using gross domestic product deflator adjustment. Estimates are in trillions.**

| Year    | Cost of illness (COI) |                |       | Value of lost output (VLO) | Value of losses using VSL approach † |                            |
|---------|-----------------------|----------------|-------|----------------------------|--------------------------------------|----------------------------|
|         | Direct costs          | Indirect costs | Total |                            | 1 DALY = 1x GDP per capita           | 1 DALY = 3x GDP per capita |
| 2010    | 0.96                  | 1.96           | 2.92  | 19.09*                     | 1.57                                 | 4.72                       |
| 2030    | 2.34                  | 4.74           | 7.08  |                            | 2.92                                 | 8.75                       |
| Average | 1.50                  | 3.05           | 4.55  |                            | 2.14                                 | 6.42                       |

\* Annual VLO estimates are not reported by disease category. The estimate of VLO is the total for the range 2010-2030 for mental disorders.

† Authors' calculations based on Bloom and colleagues.<sup>1</sup>

DALY: disability-adjusted life year. GDP: gross domestic product. VSL: value of a statistical life.

**Table S2. The economic value of mental disorder losses, using VSL approach, by year and monetary value assigned to one DALY. Authors' calculations based on Bloom and colleagues.<sup>1</sup> and adjusted to 2019 USD using gross domestic product deflator adjustment. Estimates are in trillions.**

| World Bank income group | 1 DALY = 1x GDP per capita |      | 1 DALY = 3x GDP per capita |      |
|-------------------------|----------------------------|------|----------------------------|------|
|                         | 2010                       | 2030 | 2010                       | 2030 |
| High-income             | 1.02                       | 1.32 | 3.05                       | 3.97 |
| Upper-middle-income     | 0.35                       | 1.18 | 1.05                       | 3.53 |
| Lower-middle-income     | 0.17                       | 0.36 | 0.50                       | 1.09 |
| Low-income              | 0.04                       | 0.07 | 0.11                       | 0.22 |
| Global                  | 1.57                       | 2.92 | 4.72                       | 8.75 |

DALY: disability-adjusted life year. VSL: value of a statistical life. GDP: gross domestic product.

**Table S3. Hierarchical classification of mental disorders in the Global Burden of Disease (GBD) 2019 study.<sup>2</sup>**

| Level 1                                             | Level 2                              | Level 3                                          | Level 4                            |
|-----------------------------------------------------|--------------------------------------|--------------------------------------------------|------------------------------------|
| Non-communicable diseases                           |                                      |                                                  |                                    |
|                                                     | Mental disorders                     |                                                  |                                    |
|                                                     |                                      | Schizophrenia                                    |                                    |
|                                                     |                                      | Depressive disorders                             | Major depressive disorder          |
|                                                     |                                      |                                                  | Dysthymia                          |
|                                                     |                                      | Bipolar disorder                                 |                                    |
|                                                     |                                      | Anxiety disorders                                |                                    |
|                                                     |                                      | Eating disorders                                 | Anorexia nervosa                   |
|                                                     |                                      |                                                  | Bulimia nervosa                    |
|                                                     |                                      | Autism spectrum disorders                        |                                    |
|                                                     |                                      | Attention-deficit/hyperactivity disorder         |                                    |
|                                                     |                                      | Conduct disorder                                 |                                    |
|                                                     |                                      | Idiopathic developmental intellectual disability |                                    |
|                                                     |                                      | Other mental disorders                           |                                    |
| Not classified as "mental disorders" under GBD 2019 |                                      |                                                  |                                    |
|                                                     | Substance use disorders              |                                                  |                                    |
|                                                     |                                      | Alcohol use disorders                            |                                    |
|                                                     |                                      | Drug use disorders                               | Opioid use disorders               |
|                                                     |                                      |                                                  | Cocaine use disorders              |
|                                                     |                                      |                                                  | Amphetamine use disorders          |
|                                                     |                                      |                                                  | Cannabis use disorders             |
|                                                     |                                      |                                                  | Other drug use disorders           |
|                                                     | Neurological disorders               |                                                  |                                    |
|                                                     |                                      | Alzheimer's disease and other dementias          |                                    |
|                                                     |                                      | Parkinson's disease                              |                                    |
|                                                     |                                      | Idiopathic epilepsy                              |                                    |
|                                                     |                                      | Multiple sclerosis                               |                                    |
|                                                     |                                      | Motor neuron disease                             |                                    |
|                                                     |                                      | Headache disorders                               | Migraine                           |
|                                                     |                                      |                                                  | Tension-type headache              |
|                                                     |                                      | Other neurological disorders                     |                                    |
|                                                     | Musculoskeletal disorders            |                                                  |                                    |
| Injuries                                            |                                      |                                                  |                                    |
|                                                     | Self-harm and interpersonal violence |                                                  |                                    |
|                                                     |                                      | Self-harm                                        | Self-harm by firearm               |
|                                                     |                                      |                                                  | Self-harm by other specified means |

**Table S4. Years lived with disability (YLDs) attributable to mental disorders as totals (millions) and percentages of overall burden, by World Bank income group classification and GBD region, under three estimation approaches.**

|                              | Original approach |             |             |             |             |             | Reallocation approach |             |             |             |             |             | Composite approach |             |             |             |             |             |
|------------------------------|-------------------|-------------|-------------|-------------|-------------|-------------|-----------------------|-------------|-------------|-------------|-------------|-------------|--------------------|-------------|-------------|-------------|-------------|-------------|
|                              | YLDs              |             |             | % of burden |             |             | YLDs                  |             |             | % of burden |             |             | YLDs               |             |             | % of burden |             |             |
|                              | Estimate          | Lower bound | Upper bound | Estimate    | Lower bound | Upper bound | Estimate              | Lower bound | Upper bound | Estimate    | Lower bound | Upper bound | Estimate           | Lower bound | Upper bound | Estimate    | Lower bound | Upper bound |
| Global                       | 125.3             | 93.0        | 163.2       | 14.6        | 14.5        | 14.7        | 247.2                 | 140.2       | 401.0       | 28.7        | 21.9        | 36.2        | 247.2              | 140.2       | 401.0       | 28.7        | 21.9        | 36.2        |
| High income                  | 24.5              | 18.1        | 32.0        | 14.1        | 14.0        | 14.3        | 53.9                  | 30.7        | 87.5        | 31.1        | 23.7        | 39.2        | 53.9               | 30.7        | 87.5        | 31.1        | 23.7        | 39.2        |
| Upper-middle income          | 45.6              | 33.8        | 59.7        | 14.5        | 14.4        | 14.6        | 92.8                  | 51.9        | 152.6       | 29.5        | 22.1        | 37.4        | 92.8               | 51.9        | 152.6       | 29.5        | 22.1        | 37.4        |
| Lower-middle income          | 44.9              | 33.0        | 58.9        | 14.5        | 14.3        | 14.6        | 83.5                  | 45.6        | 138.7       | 26.9        | 19.8        | 34.4        | 83.5               | 45.6        | 138.7       | 26.9        | 19.8        | 34.4        |
| Low income                   | 10.1              | 7.4         | 13.5        | 16.5        | 16.3        | 16.7        | 16.8                  | 9.4         | 27.5        | 27.3        | 20.8        | 34.1        | 16.8               | 9.4         | 27.5        | 27.3        | 20.8        | 34.1        |
| East Asia                    | 21.0              | 15.7        | 27.3        | 13.2        | 13.1        | 13.2        | 44.1                  | 24.8        | 72.2        | 27.7        | 20.8        | 35.0        | 44.1               | 24.8        | 72.2        | 27.7        | 20.8        | 35.0        |
| Southeast Asia               | 9.1               | 6.7         | 11.9        | 13.4        | 13.5        | 13.6        | 19.5                  | 9.9         | 34.2        | 28.9        | 19.9        | 39.0        | 19.5               | 9.9         | 34.2        | 28.9        | 19.9        | 39.0        |
| Oceania                      | 0.2               | 0.1         | 0.2         | 13.6        | 13.6        | 13.7        | 0.3                   | 0.2         | 0.5         | 26.0        | 18.6        | 34.0        | 0.3                | 0.2         | 0.5         | 26.0        | 18.6        | 34.0        |
| Central Asia                 | 1.3               | 0.9         | 1.7         | 14.2        | 14.2        | 14.4        | 2.7                   | 1.5         | 4.5         | 30.2        | 22.4        | 38.7        | 2.7                | 1.5         | 4.5         | 30.2        | 22.4        | 38.7        |
| Eastern Europe               | 3.5               | 2.6         | 4.5         | 12.7        | 12.7        | 12.9        | 8.0                   | 4.7         | 12.9        | 29.4        | 23.2        | 36.6        | 8.0                | 4.7         | 12.9        | 29.4        | 23.2        | 36.6        |
| Central Europe               | 1.7               | 1.3         | 2.3         | 11.6        | 11.5        | 11.7        | 4.0                   | 2.3         | 6.6         | 26.8        | 20.2        | 34.2        | 4.0                | 2.3         | 6.6         | 26.8        | 20.2        | 34.2        |
| Caribbean                    | 0.8               | 0.6         | 1.0         | 16.7        | 16.4        | 16.9        | 1.4                   | 0.8         | 2.2         | 29.2        | 22.2        | 36.6        | 1.4                | 0.8         | 2.2         | 29.2        | 22.2        | 36.6        |
| Central Latin America        | 4.1               | 3.0         | 5.4         | 15.8        | 15.5        | 16.0        | 8.0                   | 4.4         | 13.2        | 30.6        | 22.8        | 38.9        | 8.0                | 4.4         | 13.2        | 30.6        | 22.8        | 38.9        |
| Tropical Latin America       | 5.1               | 3.7         | 6.6         | 18.8        | 18.7        | 19.0        | 9.6                   | 5.5         | 15.5        | 35.6        | 27.4        | 44.6        | 9.6                | 5.5         | 15.5        | 35.6        | 27.4        | 44.6        |
| Andean Latin America         | 1.1               | 0.8         | 1.4         | 17.5        | 17.1        | 17.9        | 1.9                   | 1.1         | 3.1         | 30.6        | 23.6        | 38.0        | 1.9                | 1.1         | 3.1         | 30.6        | 23.6        | 38.0        |
| North Africa and Middle East | 10.7              | 7.8         | 14.1        | 19.4        | 19.2        | 19.8        | 18.7                  | 10.4        | 30.7        | 34.0        | 25.6        | 43.0        | 18.7               | 10.4        | 30.7        | 34.0        | 25.6        | 43.0        |
| Southern Sub-Saharan Africa  | 1.2               | 0.9         | 1.6         | 14.1        | 13.9        | 14.5        | 2.4                   | 1.4         | 3.8         | 27.1        | 20.9        | 33.6        | 2.4                | 1.4         | 3.8         | 27.1        | 20.9        | 33.6        |
| Western Sub-Saharan Africa   | 6.7               | 4.9         | 9.0         | 14.5        | 14.4        | 14.7        | 12.2                  | 6.5         | 20.7        | 26.3        | 19.0        | 34.0        | 12.2               | 6.5         | 20.7        | 26.3        | 19.0        | 34.0        |
| Central Sub-Saharan Africa   | 2.1               | 1.5         | 2.8         | 16.8        | 16.5        | 17.1        | 3.4                   | 1.9         | 5.6         | 27.4        | 20.7        | 34.3        | 3.4                | 1.9         | 5.6         | 27.4        | 20.7        | 34.3        |
| Eastern Sub-Saharan Africa   | 5.8               | 4.2         | 7.7         | 16.5        | 16.2        | 16.8        | 9.4                   | 5.5         | 15.0        | 26.6        | 21.1        | 32.5        | 9.4                | 5.5         | 15.0        | 26.6        | 21.1        | 32.5        |
| South Asia                   | 28.8              | 21.2        | 37.6        | 14.1        | 14.0        | 14.2        | 52.7                  | 29.1        | 86.8        | 25.9        | 19.1        | 32.8        | 52.7               | 29.1        | 86.8        | 25.9        | 19.1        | 32.8        |
| Southern Latin America       | 1.3               | 0.9         | 1.6         | 16.5        | 16.3        | 16.7        | 2.4                   | 1.4         | 3.8         | 31.2        | 24.3        | 38.6        | 2.4                | 1.4         | 3.8         | 31.2        | 24.3        | 38.6        |
| Western Europe               | 9.4               | 7.0         | 12.4        | 15.4        | 15.3        | 15.6        | 19.4                  | 10.9        | 31.9        | 31.7        | 24.0        | 40.4        | 19.4               | 10.9        | 31.9        | 31.7        | 24.0        | 40.4        |
| High-income North America    | 8.0               | 6.0         | 10.4        | 13.7        | 13.6        | 13.9        | 19.2                  | 11.2        | 30.5        | 33.0        | 25.6        | 41.0        | 19.2               | 11.2        | 30.5        | 33.0        | 25.6        | 41.0        |
| Australasia                  | 0.7               | 0.5         | 0.9         | 17.7        | 17.5        | 18.0        | 1.3                   | 0.8         | 2.0         | 32.6        | 26.2        | 39.3        | 1.3                | 0.8         | 2.0         | 32.6        | 26.2        | 39.3        |
| High-income Asia Pacific     | 2.7               | 2.0         | 3.5         | 10.9        | 10.8        | 11.0        | 6.4                   | 3.6         | 10.5        | 25.8        | 19.6        | 33.0        | 6.4                | 3.6         | 10.5        | 25.8        | 19.6        | 33.0        |

\* Estimates by income classification may not sum to the estimates at the global level, as not all economies are classified by income level by the World Bank. YLDs: years lived with disability. GBD: Global Burden of Disease.

**Table S5. Years of life lost (YLLs) attributable to mental disorders as totals (millions) and percentages of overall burden, by World Bank income group classification and GBD region, under three estimation approaches.**

|                              | Original approach |             |             |             |             |             | Reallocation approach |             |             |             |             |             | Composite approach |             |             |             |             |             |
|------------------------------|-------------------|-------------|-------------|-------------|-------------|-------------|-----------------------|-------------|-------------|-------------|-------------|-------------|--------------------|-------------|-------------|-------------|-------------|-------------|
|                              | YLLs              |             |             | % of burden |             |             | YLLs                  |             |             | % of burden |             |             | YLLs               |             |             | % of burden |             |             |
|                              | Estimate          | Lower bound | Upper bound | Estimate    | Lower bound | Upper bound | Estimate              | Lower bound | Upper bound | Estimate    | Lower bound | Upper bound | Estimate           | Lower bound | Upper bound | Estimate    | Lower bound | Upper bound |
| Global                       | -                 | -           | -           | -           | -           | -           | 74.0                  | 55.0        | 108.6       | 4.4         | 3.5         | 6.0         | 170.5              | 136.5       | 207.3       | 10.2        | 8.7         | 11.4        |
| High income                  | -                 | -           | -           | -           | -           | -           | 20.4                  | 14.3        | 31.9        | 10.6        | 7.7         | 15.7        | 27.1               | 22.0        | 32.8        | 14.0        | 11.9        | 16.1        |
| Upper-middle income          | -                 | -           | -           | -           | -           | -           | 24.7                  | 15.9        | 41.5        | 4.9         | 3.6         | 7.2         | 63.8               | 47.4        | 83.5        | 12.7        | 10.8        | 14.5        |
| Lower-middle income          | -                 | -           | -           | -           | -           | -           | 25.3                  | 17.8        | 37.1        | 3.4         | 2.8         | 4.4         | 63.9               | 44.6        | 86.9        | 8.7         | 6.9         | 10.2        |
| Low income                   | -                 | -           | -           | -           | -           | -           | 3.5                   | 2.2         | 5.6         | 1.5         | 1.1         | 1.9         | 15.5               | 10.4        | 22.5        | 6.5         | 5.2         | 7.8         |
| East Asia                    | -                 | -           | -           | -           | -           | -           | 11.7                  | 7.0         | 20.9        | 4.9         | 3.4         | 7.7         | 28.5               | 20.8        | 37.6        | 12.0        | 10.1        | 13.8        |
| Southeast Asia               | -                 | -           | -           | -           | -           | -           | 3.8                   | 2.2         | 6.5         | 2.9         | 2.0         | 4.3         | 12.8               | 8.8         | 17.8        | 9.8         | 8.0         | 11.7        |
| Oceania                      | -                 | -           | -           | -           | -           | -           | 0.1                   | 0.0         | 0.1         | 1.7         | 1.2         | 2.2         | 0.3                | 0.2         | 0.5         | 8.2         | 6.6         | 9.9         |
| Central Asia                 | -                 | -           | -           | -           | -           | -           | 1.1                   | 0.8         | 1.5         | 5.4         | 4.6         | 6.4         | 2.0                | 1.5         | 2.7         | 10.2        | 8.6         | 11.9        |
| Eastern Europe               | -                 | -           | -           | -           | -           | -           | 5.4                   | 4.0         | 7.8         | 8.8         | 7.4         | 11.1        | 8.1                | 6.0         | 10.6        | 13.1        | 11.0        | 15.1        |
| Central Europe               | -                 | -           | -           | -           | -           | -           | 1.7                   | 1.1         | 2.9         | 6.7         | 5.0         | 9.6         | 2.8                | 1.9         | 3.9         | 10.9        | 9.2         | 12.7        |
| Caribbean                    | -                 | -           | -           | -           | -           | -           | 0.4                   | 0.2         | 0.6         | 3.8         | 2.8         | 5.2         | 1.3                | 0.9         | 1.9         | 13.0        | 10.8        | 15.2        |
| Central Latin America        | -                 | -           | -           | -           | -           | -           | 2.1                   | 1.3         | 3.4         | 5.1         | 4.0         | 6.9         | 6.2                | 4.4         | 8.6         | 15.3        | 13.1        | 17.6        |
| Tropical Latin America       | -                 | -           | -           | -           | -           | -           | 2.0                   | 1.4         | 3.2         | 5.0         | 3.7         | 7.6         | 7.4                | 6.2         | 8.6         | 18.3        | 16.1        | 20.5        |
| Andean Latin America         | -                 | -           | -           | -           | -           | -           | 0.4                   | 0.2         | 0.7         | 4.6         | 3.2         | 6.3         | 1.3                | 0.8         | 1.9         | 13.6        | 11.4        | 16.0        |
| North Africa and Middle East | -                 | -           | -           | -           | -           | -           | 2.8                   | 1.7         | 4.9         | 3.5         | 2.5         | 5.2         | 12.6               | 8.9         | 17.4        | 15.9        | 13.5        | 18.4        |
| Southern Sub-Saharan Africa  | -                 | -           | -           | -           | -           | -           | 0.8                   | 0.6         | 1.2         | 2.8         | 2.2         | 3.6         | 2.3                | 1.7         | 3.1         | 7.9         | 6.5         | 9.3         |
| Western Sub-Saharan Africa   | -                 | -           | -           | -           | -           | -           | 2.5                   | 1.5         | 4.1         | 1.1         | 0.8         | 1.6         | 8.6                | 5.4         | 12.8        | 4.0         | 3.0         | 5.0         |
| Central Sub-Saharan Africa   | -                 | -           | -           | -           | -           | -           | 0.7                   | 0.5         | 1.1         | 1.6         | 1.2         | 2.0         | 2.9                | 1.9         | 4.3         | 6.5         | 5.0         | 8.0         |
| Eastern Sub-Saharan Africa   | -                 | -           | -           | -           | -           | -           | 1.9                   | 1.3         | 3.0         | 1.5         | 1.2         | 1.9         | 6.4                | 4.4         | 9.2         | 4.9         | 3.9         | 5.9         |
| South Asia                   | -                 | -           | -           | -           | -           | -           | 18.0                  | 13.3        | 25.3        | 4.2         | 3.5         | 5.3         | 43.3               | 30.8        | 57.4        | 10.1        | 8.1         | 12.0        |
| Southern Latin America       | -                 | -           | -           | -           | -           | -           | 0.7                   | 0.5         | 1.0         | 6.5         | 5.0         | 9.5         | 1.5                | 1.2         | 1.7         | 13.8        | 11.9        | 15.6        |
| Western Europe               | -                 | -           | -           | -           | -           | -           | 6.1                   | 4.0         | 10.4        | 9.4         | 6.1         | 15.6        | 9.1                | 7.5         | 10.7        | 13.8        | 11.7        | 16.0        |
| High-income North America    | -                 | -           | -           | -           | -           | -           | 7.9                   | 6.5         | 10.6        | 12.6        | 10.5        | 16.8        | 9.8                | 8.3         | 11.2        | 15.5        | 13.3        | 17.7        |
| Australasia                  | -                 | -           | -           | -           | -           | -           | 0.4                   | 0.3         | 0.6         | 11.7        | 8.5         | 17.7        | 0.6                | 0.5         | 0.7         | 16.8        | 14.4        | 19.2        |
| High-income Asia Pacific     | -                 | -           | -           | -           | -           | -           | 3.4                   | 1.9         | 6.0         | 13.5        | 7.7         | 23.2        | 2.7                | 2.2         | 3.2         | 10.6        | 8.7         | 12.5        |

\* Estimates by income classification may not sum to the estimates at the global level, as not all economies are classified by income level by the World Bank. YLLs: years of life lost. GBD: Global Burden of Disease.

**Table S6. Deaths attributable to mental disorders as totals (millions) and percentages of overall burden, by World Bank income classification and GBD region, under three estimation approaches.**

|                              | Original approach |             |             |             |             |             | Reallocation approach |             |             |             |             |             | Composite approach |             |             |             |             |             |
|------------------------------|-------------------|-------------|-------------|-------------|-------------|-------------|-----------------------|-------------|-------------|-------------|-------------|-------------|--------------------|-------------|-------------|-------------|-------------|-------------|
|                              | Deaths            |             |             | % of burden |             |             | Deaths                |             |             | % of burden |             |             | Deaths             |             |             | % of burden |             |             |
|                              | Estimate          | Lower bound | Upper bound | Estimate    | Lower bound | Upper bound | Estimate              | Lower bound | Upper bound | Estimate    | Lower bound | Upper bound | Estimate           | Lower bound | Upper bound | Estimate    | Lower bound | Upper bound |
| Global                       | -                 | -           | -           | -           | -           | -           | 3.2                   | 1.8         | 5.9         | 5.6         | 3.3         | 9.9         | 5.9                | 4.7         | 7.1         | 10.4        | 8.8         | 12.0        |
| High income                  | -                 | -           | -           | -           | -           | -           | 1.1                   | 0.6         | 2.2         | 10.2        | 5.3         | 19.1        | 1.4                | 1.1         | 1.7         | 12.3        | 10.3        | 14.3        |
| Upper-middle income          | -                 | -           | -           | -           | -           | -           | 1.1                   | 0.6         | 2.3         | 5.4         | 3.1         | 9.6         | 2.3                | 1.7         | 3.0         | 11.1        | 9.3         | 12.8        |
| Lower-middle income          | -                 | -           | -           | -           | -           | -           | 0.8                   | 0.5         | 1.4         | 3.9         | 2.7         | 6.2         | 1.9                | 1.3         | 2.6         | 9.6         | 7.7         | 11.4        |
| Low income                   | -                 | -           | -           | -           | -           | -           | 0.1                   | 0.1         | 0.2         | 2.4         | 1.5         | 3.8         | 0.4                | 0.2         | 0.5         | 7.7         | 6.2         | 9.3         |
| East Asia                    | -                 | -           | -           | -           | -           | -           | 0.6                   | 0.3         | 1.2         | 5.3         | 3.0         | 9.4         | 1.2                | 0.9         | 1.5         | 10.5        | 8.8         | 12.2        |
| Southeast Asia               | -                 | -           | -           | -           | -           | -           | 0.2                   | 0.1         | 0.3         | 3.8         | 2.0         | 6.8         | 0.4                | 0.3         | 0.6         | 9.2         | 7.5         | 11.0        |
| Oceania                      | -                 | -           | -           | -           | -           | -           | 0.0                   | 0.0         | 0.0         | 2.1         | 1.4         | 3.1         | 0.0                | 0.0         | 0.0         | 8.7         | 7.1         | 10.4        |
| Central Asia                 | -                 | -           | -           | -           | -           | -           | 0.0                   | 0.0         | 0.1         | 4.7         | 3.4         | 6.9         | 0.1                | 0.0         | 0.1         | 9.6         | 8.0         | 11.2        |
| Eastern Europe               | -                 | -           | -           | -           | -           | -           | 0.2                   | 0.1         | 0.3         | 7.1         | 4.9         | 11.2        | 0.3                | 0.2         | 0.4         | 11.2        | 9.4         | 13.0        |
| Central Europe               | -                 | -           | -           | -           | -           | -           | 0.1                   | 0.0         | 0.2         | 6.6         | 3.7         | 11.4        | 0.1                | 0.1         | 0.2         | 9.9         | 8.2         | 11.5        |
| Caribbean                    | -                 | -           | -           | -           | -           | -           | 0.0                   | 0.0         | 0.0         | 5.2         | 3.1         | 8.4         | 0.0                | 0.0         | 0.1         | 12.7        | 10.6        | 15.0        |
| Central Latin America        | -                 | -           | -           | -           | -           | -           | 0.1                   | 0.0         | 0.2         | 6.4         | 3.6         | 10.8        | 0.2                | 0.1         | 0.2         | 12.6        | 10.6        | 14.8        |
| Tropical Latin America       | -                 | -           | -           | -           | -           | -           | 0.1                   | 0.0         | 0.2         | 6.5         | 3.5         | 12.5        | 0.2                | 0.2         | 0.3         | 15.5        | 13.4        | 17.7        |
| Andean Latin America         | -                 | -           | -           | -           | -           | -           | 0.0                   | 0.0         | 0.0         | 6.1         | 3.4         | 10.3        | 0.0                | 0.0         | 0.1         | 12.1        | 10.0        | 14.3        |
| North Africa and Middle East | -                 | -           | -           | -           | -           | -           | 0.1                   | 0.1         | 0.3         | 4.4         | 2.4         | 8.0         | 0.4                | 0.3         | 0.5         | 14.3        | 11.9        | 16.7        |
| Southern Sub-Saharan Africa  | -                 | -           | -           | -           | -           | -           | 0.0                   | 0.0         | 0.0         | 3.3         | 2.1         | 5.3         | 0.1                | 0.0         | 0.1         | 8.0         | 6.6         | 9.5         |
| Western Sub-Saharan Africa   | -                 | -           | -           | -           | -           | -           | 0.1                   | 0.0         | 0.2         | 2.2         | 1.3         | 3.5         | 0.2                | 0.1         | 0.3         | 5.1         | 3.9         | 6.3         |
| Central Sub-Saharan Africa   | -                 | -           | -           | -           | -           | -           | 0.0                   | 0.0         | 0.0         | 2.4         | 1.6         | 3.5         | 0.1                | 0.0         | 0.1         | 7.4         | 5.8         | 9.1         |
| Eastern Sub-Saharan Africa   | -                 | -           | -           | -           | -           | -           | 0.1                   | 0.0         | 0.1         | 2.4         | 1.6         | 3.8         | 0.2                | 0.1         | 0.2         | 6.0         | 4.8         | 7.2         |
| South Asia                   | -                 | -           | -           | -           | -           | -           | 0.5                   | 0.3         | 0.9         | 4.3         | 3.0         | 6.5         | 1.3                | 0.9         | 1.7         | 10.6        | 8.4         | 12.5        |
| Southern Latin America       | -                 | -           | -           | -           | -           | -           | 0.0                   | 0.0         | 0.1         | 6.7         | 3.7         | 12.8        | 0.1                | 0.0         | 0.1         | 11.6        | 9.8         | 13.3        |
| Western Europe               | -                 | -           | -           | -           | -           | -           | 0.4                   | 0.2         | 0.8         | 9.5         | 4.6         | 19.2        | 0.5                | 0.4         | 0.6         | 12.7        | 10.6        | 14.8        |
| High-income North America    | -                 | -           | -           | -           | -           | -           | 0.3                   | 0.2         | 0.6         | 10.4        | 6.4         | 17.8        | 0.4                | 0.4         | 0.5         | 13.7        | 11.7        | 15.8        |
| Australasia                  | -                 | -           | -           | -           | -           | -           | 0.0                   | 0.0         | 0.0         | 10.6        | 5.5         | 20.6        | 0.0                | 0.0         | 0.0         | 14.9        | 12.6        | 17.3        |
| High-income Asia Pacific     | -                 | -           | -           | -           | -           | -           | 0.2                   | 0.1         | 0.5         | 14.3        | 6.1         | 29.2        | 0.2                | 0.1         | 0.2         | 9.0         | 7.3         | 10.7        |

\* Estimates by income classification may not sum to the estimates at the global level, as not all economies are classified by income level by the World Bank. GBD: Global Burden of Disease.

**Table S7. The global economic burden associated with premature mortality and morbidity from mental disorders, by estimation approach and value per DALY, using alternative valuations. Dollar amounts are in trillions.**

| <i>Panel A: Using values per DALY of \$1,000 and \$5,000 (USD 2019)</i> |                   |             |             |                       |             |             |                    |             |             |
|-------------------------------------------------------------------------|-------------------|-------------|-------------|-----------------------|-------------|-------------|--------------------|-------------|-------------|
| Value per DALY<br>(USD, 2019)                                           | Original approach |             |             | Reallocation approach |             |             | Composite approach |             |             |
|                                                                         | Estimate          | Lower bound | Upper bound | Estimate              | Lower bound | Upper bound | Estimate           | Lower bound | Upper bound |
| \$1,000                                                                 | 0.13              | 0.09        | 0.16        | 0.32                  | 0.20        | 0.51        | 0.42               | 0.28        | 0.61        |
| \$5,000                                                                 | 0.63              | 0.46        | 0.82        | 1.61                  | 0.99        | 2.53        | 2.09               | 1.38        | 3.04        |

  

| <i>Panel B: Using GDP per capita, PPP-adjusted, per DALY (international dollars, 2019)</i> |                   |             |             |                       |             |             |                    |             |             |
|--------------------------------------------------------------------------------------------|-------------------|-------------|-------------|-----------------------|-------------|-------------|--------------------|-------------|-------------|
| Value per DALY<br>(International dollar, 2019)                                             | Original approach |             |             | Reallocation approach |             |             | Composite approach |             |             |
|                                                                                            | Estimate          | Lower bound | Upper bound | Estimate              | Lower bound | Upper bound | Estimate           | Lower bound | Upper bound |
| 1x GDP PPP/capita                                                                          | 2.18              | 1.62        | 2.84        | 5.60                  | 3.46        | 8.80        | 7.28               | 4.82        | 10.60       |
| 3x GDP PPP/capita                                                                          | 6.55              | 4.86        | 8.53        | 16.79                 | 10.38       | 26.41       | 21.84              | 14.47       | 31.80       |

DALY: disability-adjusted life year. USD: United States dollar. GDP: gross domestic product. PPP: purchasing power parity.

**Table S8. The economic burden associated with premature mortality and morbidity from mental disorders, by estimation approach and value per DALY, using alternative valuations and by World Bank income classification and GBD region. Dollar amounts are in trillions.**

| <i>Panel A: Using \$1,000 per DALY (USD 2019)</i> |                   |             |             |                            |             |             |                    |             |             |
|---------------------------------------------------|-------------------|-------------|-------------|----------------------------|-------------|-------------|--------------------|-------------|-------------|
|                                                   | Original approach |             |             | 2016 reallocation approach |             |             | Composite approach |             |             |
|                                                   | Estimate          | Lower bound | Upper bound | Estimate                   | Lower bound | Upper bound | Estimate           | Lower bound | Upper bound |
| Global                                            | 0.13              | 0.09        | 0.16        | 0.32                       | 0.20        | 0.51        | 0.42               | 0.28        | 0.61        |
| High income                                       | 0.02              | 0.02        | 0.03        | 0.07                       | 0.05        | 0.12        | 0.08               | 0.05        | 0.12        |
| Upper-middle income                               | 0.05              | 0.03        | 0.06        | 0.12                       | 0.07        | 0.19        | 0.16               | 0.10        | 0.24        |
| Lower-middle income                               | 0.04              | 0.03        | 0.06        | 0.11                       | 0.06        | 0.17        | 0.15               | 0.09        | 0.23        |
| Low income                                        | 0.01              | 0.01        | 0.01        | 0.02                       | 0.01        | 0.03        | 0.03               | 0.02        | 0.05        |
| East Asia                                         | 0.02              | 0.02        | 0.03        | 0.06                       | 0.03        | 0.09        | 0.07               | 0.05        | 0.11        |
| Southeast Asia                                    | 0.01              | 0.01        | 0.01        | 0.02                       | 0.01        | 0.04        | 0.03               | 0.02        | 0.05        |
| Oceania                                           | -                 | -           | -           | -                          | -           | -           | -                  | -           | -           |
| Central Asia                                      | -                 | -           | -           | -                          | -           | 0.01        | -                  | -           | 0.01        |
| Eastern Europe                                    | -                 | -           | -           | 0.01                       | 0.01        | 0.02        | 0.02               | 0.01        | 0.02        |
| Central Europe                                    | -                 | -           | -           | 0.01                       | -           | 0.01        | 0.01               | -           | 0.01        |
| Caribbean                                         | -                 | -           | -           | -                          | -           | -           | -                  | -           | -           |
| Central Latin America                             | -                 | -           | 0.01        | 0.01                       | 0.01        | 0.02        | 0.01               | 0.01        | 0.02        |
| Tropical Latin America                            | 0.01              | -           | 0.01        | 0.01                       | 0.01        | 0.02        | 0.02               | 0.01        | 0.02        |
| Andean Latin America                              | -                 | -           | -           | -                          | -           | -           | -                  | -           | -           |
| North Africa and Middle East                      | 0.01              | 0.01        | 0.01        | 0.02                       | 0.01        | 0.04        | 0.03               | 0.02        | 0.05        |
| Southern Sub-Saharan Africa                       | -                 | -           | -           | -                          | -           | -           | -                  | -           | 0.01        |
| Western Sub-Saharan Africa                        | 0.01              | -           | 0.01        | 0.01                       | 0.01        | 0.02        | 0.02               | 0.01        | 0.03        |
| Central Sub-Saharan Africa                        | -                 | -           | -           | -                          | -           | 0.01        | 0.01               | -           | 0.01        |

|                                                   |                   |             |             |                            |             |             |                    |             |             |
|---------------------------------------------------|-------------------|-------------|-------------|----------------------------|-------------|-------------|--------------------|-------------|-------------|
| Eastern Sub-Saharan Africa                        | 0.01              | -           | 0.01        | 0.01                       | 0.01        | 0.02        | 0.02               | 0.01        | 0.02        |
| South Asia                                        | 0.03              | 0.02        | 0.04        | 0.07                       | 0.04        | 0.11        | 0.10               | 0.06        | 0.14        |
| Southern Latin America                            | -                 | -           | -           | -                          | -           | -           | -                  | -           | 0.01        |
| Western Europe                                    | 0.01              | 0.01        | 0.01        | 0.03                       | 0.02        | 0.04        | 0.03               | 0.02        | 0.04        |
| High-income North America                         | 0.01              | 0.01        | 0.01        | 0.03                       | 0.02        | 0.04        | 0.03               | 0.02        | 0.04        |
| Australasia                                       | -                 | -           | -           | -                          | -           | -           | -                  | -           | -           |
| High-income Asia Pacific                          | -                 | -           | -           | 0.01                       | 0.01        | 0.02        | 0.01               | 0.01        | 0.01        |
| <i>Panel B: Using \$5,000 per DALY (USD 2019)</i> |                   |             |             |                            |             |             |                    |             |             |
|                                                   | Original approach |             |             | 2016 reallocation approach |             |             | Composite approach |             |             |
|                                                   | Estimate          | Lower bound | Upper bound | Estimate                   | Lower bound | Upper bound | Estimate           | Lower bound | Upper bound |
| Global                                            | 0.63              | 0.46        | 0.82        | 1.61                       | 0.99        | 2.53        | 2.09               | 1.38        | 3.04        |
| High income                                       | 0.12              | 0.09        | 0.16        | 0.37                       | 0.23        | 0.59        | 0.40               | 0.26        | 0.60        |
| Upper-middle income                               | 0.23              | 0.17        | 0.30        | 0.59                       | 0.35        | 0.96        | 0.78               | 0.50        | 1.18        |
| Lower-middle income                               | 0.22              | 0.17        | 0.29        | 0.54                       | 0.32        | 0.87        | 0.74               | 0.45        | 1.13        |
| Low income                                        | 0.05              | 0.04        | 0.07        | 0.10                       | 0.06        | 0.16        | 0.16               | 0.10        | 0.25        |
| East Asia                                         | 0.10              | 0.08        | 0.14        | 0.28                       | 0.16        | 0.46        | 0.36               | 0.23        | 0.55        |
| Southeast Asia                                    | 0.05              | 0.03        | 0.06        | 0.12                       | 0.06        | 0.20        | 0.16               | 0.09        | 0.26        |
| Oceania                                           | -                 | -           | -           | -                          | -           | -           | -                  | -           | 0.01        |
| Central Asia                                      | 0.01              | -           | 0.01        | 0.02                       | 0.01        | 0.03        | 0.02               | 0.01        | 0.04        |
| Eastern Europe                                    | 0.02              | 0.01        | 0.02        | 0.07                       | 0.05        | 0.10        | 0.08               | 0.05        | 0.12        |
| Central Europe                                    | 0.01              | 0.01        | 0.01        | 0.03                       | 0.02        | 0.05        | 0.03               | 0.02        | 0.05        |
| Caribbean                                         | -                 | -           | 0.01        | 0.01                       | 0.01        | 0.01        | 0.01               | 0.01        | 0.02        |
| Central Latin America                             | 0.02              | 0.02        | 0.03        | 0.05                       | 0.03        | 0.08        | 0.07               | 0.04        | 0.11        |
| Tropical Latin America                            | 0.03              | 0.02        | 0.03        | 0.06                       | 0.03        | 0.09        | 0.08               | 0.06        | 0.12        |
| Andean Latin America                              | 0.01              | -           | 0.01        | 0.01                       | 0.01        | 0.02        | 0.02               | 0.01        | 0.02        |



|                              |      |      |      |      |      |      |      |      |      |
|------------------------------|------|------|------|------|------|------|------|------|------|
| North Africa and Middle East | 0-05 | 0-04 | 0-07 | 0-11 | 0-06 | 0-18 | 0-16 | 0-10 | 0-24 |
| Southern Sub-Saharan Africa  | 0-01 | -    | 0-01 | 0-02 | 0-01 | 0-02 | 0-02 | 0-02 | 0-03 |
| Western Sub-Saharan Africa   | 0-03 | 0-02 | 0-04 | 0-07 | 0-04 | 0-12 | 0-10 | 0-06 | 0-17 |
| Central Sub-Saharan Africa   | 0-01 | 0-01 | 0-01 | 0-02 | 0-01 | 0-03 | 0-03 | 0-02 | 0-05 |
| Eastern Sub-Saharan Africa   | 0-03 | 0-02 | 0-04 | 0-06 | 0-03 | 0-09 | 0-08 | 0-05 | 0-12 |
| South Asia                   | 0-14 | 0-11 | 0-19 | 0-35 | 0-22 | 0-56 | 0-48 | 0-30 | 0-72 |
| Southern Latin America       | 0-01 | -    | 0-01 | 0-02 | 0-01 | 0-02 | 0-02 | 0-01 | 0-03 |
| Western Europe               | 0-05 | 0-03 | 0-06 | 0-13 | 0-08 | 0-21 | 0-14 | 0-09 | 0-21 |
| High-income North America    | 0-04 | 0-03 | 0-05 | 0-14 | 0-09 | 0-20 | 0-14 | 0-10 | 0-21 |
| Australasia                  | -    | -    | -    | 0-01 | 0-01 | 0-01 | 0-01 | 0-01 | 0-01 |
| High-income Asia Pacific     | 0-01 | 0-01 | 0-02 | 0-05 | 0-03 | 0-08 | 0-05 | 0-03 | 0-07 |

*Panel C: Using 1x GDP per capita, per DALY (USD 2019)*

|                     | Original approach |             |             | 2016 reallocation approach |             |             | Composite approach |             |             |
|---------------------|-------------------|-------------|-------------|----------------------------|-------------|-------------|--------------------|-------------|-------------|
|                     | Estimate          | Lower bound | Upper bound | Estimate                   | Lower bound | Upper bound | Estimate           | Lower bound | Upper bound |
| Global              | 1-42              | 1-06        | 1-85        | 3-64                       | 2-25        | 5-73        | 4-74               | 3-14        | 6-90        |
| High income         | 1-12              | 0-83        | 1-46        | 3-46                       | 2-19        | 5-41        | 3-72               | 2-45        | 5-48        |
| Upper-middle income | 0-40              | 0-29        | 0-52        | 1-04                       | 0-62        | 1-69        | 1-37               | 0-87        | 2-07        |
| Lower-middle income | 0-10              | 0-07        | 0-13        | 0-24                       | 0-14        | 0-38        | 0-32               | 0-20        | 0-49        |
| Low income          | 0-01              | -           | 0-01        | 0-01                       | 0-01        | 0-02        | 0-02               | 0-01        | 0-03        |
| East Asia           | 0-20              | 0-15        | 0-26        | 0-54                       | 0-32        | 0-89        | 0-71               | 0-44        | 1-07        |
| Southeast Asia      | 0-04              | 0-03        | 0-05        | 0-10                       | 0-05        | 0-17        | 0-14               | 0-08        | 0-22        |
| Oceania             | -                 | -           | -           | -                          | -           | -           | -                  | -           | -           |
| Central Asia        | 0-01              | -           | 0-01        | 0-02                       | 0-01        | 0-02        | 0-02               | 0-01        | 0-03        |
| Eastern Europe      | 0-03              | 0-02        | 0-04        | 0-13                       | 0-09        | 0-20        | 0-16               | 0-10        | 0-23        |
| Central Europe      | 0-03              | 0-02        | 0-03        | 0-08                       | 0-05        | 0-14        | 0-10               | 0-06        | 0-15        |

|                              |      |      |      |      |      |      |      |      |      |
|------------------------------|------|------|------|------|------|------|------|------|------|
| Caribbean                    | 0-01 | -    | 0-01 | 0-01 | 0-01 | 0-02 | 0-02 | 0-01 | 0-03 |
| Central Latin America        | 0-03 | 0-02 | 0-04 | 0-08 | 0-04 | 0-12 | 0-11 | 0-07 | 0-16 |
| Tropical Latin America       | 0-04 | 0-03 | 0-06 | 0-10 | 0-06 | 0-16 | 0-14 | 0-10 | 0-20 |
| Andean Latin America         | 0-01 | -    | 0-01 | 0-01 | 0-01 | 0-02 | 0-02 | 0-01 | 0-03 |
| North Africa and Middle East | 0-08 | 0-06 | 0-10 | 0-16 | 0-09 | 0-26 | 0-23 | 0-14 | 0-36 |
| Southern Sub-Saharan Africa  | 0-01 | -    | 0-01 | 0-02 | 0-01 | 0-03 | 0-02 | 0-02 | 0-04 |
| Western Sub-Saharan Africa   | 0-01 | 0-01 | 0-02 | 0-03 | 0-01 | 0-04 | 0-04 | 0-02 | 0-06 |
| Central Sub-Saharan Africa   | -    | -    | -    | 0-01 | -    | 0-01 | 0-01 | 0-01 | 0-01 |
| Eastern Sub-Saharan Africa   | 0-01 | -    | 0-01 | 0-01 | 0-01 | 0-02 | 0-02 | 0-01 | 0-02 |
| South Asia                   | 0-05 | 0-04 | 0-07 | 0-13 | 0-08 | 0-21 | 0-18 | 0-11 | 0-27 |
| Southern Latin America       | 0-01 | 0-01 | 0-02 | 0-04 | 0-02 | 0-06 | 0-04 | 0-03 | 0-06 |
| Western Europe               | 0-40 | 0-29 | 0-52 | 1-07 | 0-64 | 1-76 | 1-20 | 0-77 | 1-79 |
| High-income North America    | 0-51 | 0-38 | 0-66 | 1-72 | 1-15 | 2-58 | 1-84 | 1-24 | 2-65 |
| Australasia                  | 0-04 | 0-03 | 0-05 | 0-09 | 0-06 | 0-15 | 0-10 | 0-07 | 0-15 |
| High-income Asia Pacific     | 0-10 | 0-08 | 0-13 | 0-37 | 0-22 | 0-62 | 0-34 | 0-22 | 0-52 |

*Panel D: Using 3x GDP per capita, per DALY (USD 2019)*

|                     | Original approach |             |             | 2016 reallocation approach |             |             | Composite approach |             |             |
|---------------------|-------------------|-------------|-------------|----------------------------|-------------|-------------|--------------------|-------------|-------------|
|                     | Estimate          | Lower bound | Upper bound | Estimate                   | Lower bound | Upper bound | Estimate           | Lower bound | Upper bound |
| Global              | 4-27              | 3-17        | 5-55        | 10-93                      | 6-76        | 17-20       | 14-22              | 9-42        | 20-71       |
| High income         | 3-35              | 2-48        | 4-37        | 10-37                      | 6-56        | 16-23       | 11-16              | 7-35        | 16-43       |
| Upper-middle income | 1-19              | 0-88        | 1-56        | 3-13                       | 1-86        | 5-08        | 4-12               | 2-62        | 6-20        |
| Lower-middle income | 0-29              | 0-21        | 0-38        | 0-71                       | 0-42        | 1-14        | 0-96               | 0-59        | 1-48        |
| Low income          | 0-02              | 0-01        | 0-02        | 0-04                       | 0-02        | 0-06        | 0-06               | 0-04        | 0-09        |
| East Asia           | 0-61              | 0-46        | 0-79        | 1-63                       | 0-96        | 2-67        | 2-12               | 1-33        | 3-20        |
| Southeast Asia      | 0-12              | 0-09        | 0-15        | 0-30                       | 0-16        | 0-52        | 0-42               | 0-24        | 0-67        |

|                              |      |      |      |      |      |      |      |      |      |
|------------------------------|------|------|------|------|------|------|------|------|------|
| Oceania                      | -    | -    | -    | -    | -    | 0.01 | 0.01 | -    | 0.01 |
| Central Asia                 | 0.02 | 0.01 | 0.02 | 0.05 | 0.03 | 0.07 | 0.06 | 0.04 | 0.09 |
| Eastern Europe               | 0.10 | 0.07 | 0.13 | 0.39 | 0.26 | 0.59 | 0.47 | 0.31 | 0.69 |
| Central Europe               | 0.08 | 0.06 | 0.10 | 0.25 | 0.15 | 0.41 | 0.30 | 0.18 | 0.46 |
| Caribbean                    | 0.02 | 0.01 | 0.02 | 0.04 | 0.02 | 0.06 | 0.05 | 0.03 | 0.08 |
| Central Latin America        | 0.09 | 0.07 | 0.12 | 0.23 | 0.13 | 0.37 | 0.32 | 0.20 | 0.49 |
| Tropical Latin America       | 0.13 | 0.09 | 0.17 | 0.29 | 0.18 | 0.47 | 0.43 | 0.29 | 0.61 |
| Andean Latin America         | 0.02 | 0.01 | 0.03 | 0.04 | 0.02 | 0.07 | 0.06 | 0.03 | 0.09 |
| North Africa and Middle East | 0.24 | 0.17 | 0.31 | 0.48 | 0.27 | 0.78 | 0.69 | 0.43 | 1.07 |
| Southern Sub-Saharan Africa  | 0.02 | 0.01 | 0.03 | 0.05 | 0.03 | 0.08 | 0.07 | 0.05 | 0.11 |
| Western Sub-Saharan Africa   | 0.04 | 0.03 | 0.05 | 0.08 | 0.04 | 0.13 | 0.11 | 0.06 | 0.18 |
| Central Sub-Saharan Africa   | 0.01 | 0.01 | 0.01 | 0.02 | 0.01 | 0.03 | 0.03 | 0.02 | 0.04 |
| Eastern Sub-Saharan Africa   | 0.02 | 0.01 | 0.02 | 0.03 | 0.02 | 0.05 | 0.05 | 0.03 | 0.07 |
| South Asia                   | 0.16 | 0.12 | 0.21 | 0.40 | 0.25 | 0.63 | 0.55 | 0.34 | 0.82 |
| Southern Latin America       | 0.04 | 0.03 | 0.06 | 0.11 | 0.07 | 0.17 | 0.13 | 0.09 | 0.19 |
| Western Europe               | 1.19 | 0.88 | 1.56 | 3.22 | 1.92 | 5.28 | 3.59 | 2.32 | 5.37 |
| High-income North America    | 1.52 | 1.14 | 1.97 | 5.17 | 3.44 | 7.75 | 5.52 | 3.72 | 7.95 |
| Australasia                  | 0.12 | 0.09 | 0.16 | 0.28 | 0.18 | 0.44 | 0.31 | 0.21 | 0.45 |
| High-income Asia Pacific     | 0.31 | 0.23 | 0.40 | 1.12 | 0.65 | 1.86 | 1.03 | 0.66 | 1.57 |

*Panel E: Using 3x GDP per capita, PPP-adjusted, per DALY (international dollars, 2019)*

|                     | Original approach |             |             | 2016 reallocation approach |             |             | Composite approach |             |             |
|---------------------|-------------------|-------------|-------------|----------------------------|-------------|-------------|--------------------|-------------|-------------|
|                     | Estimate          | Lower bound | Upper bound | Estimate                   | Lower bound | Upper bound | Estimate           | Lower bound | Upper bound |
| Global              | 2.18              | 1.62        | 2.84        | 5.60                       | 3.46        | 8.80        | 7.28               | 4.82        | 10.60       |
| High income         | 1.27              | 0.94        | 1.66        | 3.88                       | 2.44        | 6.11        | 4.22               | 2.76        | 6.23        |
| Upper-middle income | 0.78              | 0.58        | 1.02        | 2.05                       | 1.23        | 3.33        | 2.70               | 1.71        | 4.06        |

|                                                                                               |                   |      |      |                            |      |      |                    |      |      |
|-----------------------------------------------------------------------------------------------|-------------------|------|------|----------------------------|------|------|--------------------|------|------|
| Lower-middle income                                                                           | 0.31              | 0.23 | 0.40 | 0.75                       | 0.45 | 1.20 | 1.02               | 0.63 | 1.56 |
| Low income                                                                                    | 0.02              | 0.01 | 0.02 | 0.04                       | 0.02 | 0.06 | 0.06               | 0.03 | 0.09 |
| East Asia                                                                                     | 0.33              | 0.25 | 0.43 | 0.89                       | 0.52 | 1.46 | 1.16               | 0.73 | 1.75 |
| Southeast Asia                                                                                | 0.11              | 0.08 | 0.14 | 0.28                       | 0.15 | 0.49 | 0.39               | 0.23 | 0.63 |
| Oceania                                                                                       | -                 | -    | -    | -                          | -    | -    | -                  | -    | -    |
| Central Asia                                                                                  | 0.02              | 0.01 | 0.02 | 0.05                       | 0.03 | 0.08 | 0.06               | 0.04 | 0.09 |
| Eastern Europe                                                                                | 0.09              | 0.07 | 0.12 | 0.35                       | 0.23 | 0.52 | 0.41               | 0.27 | 0.61 |
| Central Europe                                                                                | 0.05              | 0.04 | 0.07 | 0.18                       | 0.11 | 0.29 | 0.21               | 0.13 | 0.32 |
| Caribbean                                                                                     | 0.01              | -    | 0.01 | 0.02                       | 0.01 | 0.02 | 0.02               | 0.01 | 0.04 |
| Central Latin America                                                                         | 0.06              | 0.05 | 0.08 | 0.16                       | 0.09 | 0.25 | 0.22               | 0.14 | 0.34 |
| Tropical Latin America                                                                        | 0.08              | 0.06 | 0.10 | 0.17                       | 0.10 | 0.28 | 0.25               | 0.17 | 0.36 |
| Andean Latin America                                                                          | 0.01              | 0.01 | 0.02 | 0.03                       | 0.02 | 0.04 | 0.04               | 0.02 | 0.06 |
| North Africa and Middle East                                                                  | 0.19              | 0.14 | 0.25 | 0.38                       | 0.22 | 0.63 | 0.55               | 0.34 | 0.85 |
| Southern Sub-Saharan Africa                                                                   | 0.02              | 0.01 | 0.02 | 0.04                       | 0.02 | 0.06 | 0.06               | 0.04 | 0.08 |
| Western Sub-Saharan Africa                                                                    | 0.03              | 0.02 | 0.04 | 0.06                       | 0.03 | 0.10 | 0.09               | 0.05 | 0.14 |
| Central Sub-Saharan Africa                                                                    | 0.01              | -    | 0.01 | 0.01                       | 0.01 | 0.02 | 0.02               | 0.01 | 0.03 |
| Eastern Sub-Saharan Africa                                                                    | 0.02              | 0.01 | 0.02 | 0.03                       | 0.02 | 0.05 | 0.04               | 0.03 | 0.06 |
| South Asia                                                                                    | 0.18              | 0.13 | 0.24 | 0.45                       | 0.27 | 0.70 | 0.61               | 0.38 | 0.91 |
| Southern Latin America                                                                        | 0.03              | 0.02 | 0.04 | 0.07                       | 0.05 | 0.12 | 0.09               | 0.06 | 0.13 |
| Western Europe                                                                                | 0.47              | 0.35 | 0.62 | 1.28                       | 0.76 | 2.09 | 1.42               | 0.92 | 2.13 |
| High-income North America                                                                     | 0.51              | 0.38 | 0.66 | 1.73                       | 1.15 | 2.60 | 1.85               | 1.25 | 2.67 |
| Australasia                                                                                   | 0.04              | 0.03 | 0.05 | 0.09                       | 0.06 | 0.14 | 0.10               | 0.07 | 0.14 |
| High-income Asia Pacific                                                                      | 0.12              | 0.09 | 0.15 | 0.43                       | 0.25 | 0.71 | 0.40               | 0.25 | 0.60 |
| <i>Panel F: Using 3x GDP per capita, PPP-adjusted, per DALY (international dollars, 2019)</i> |                   |      |      |                            |      |      |                    |      |      |
|                                                                                               | Original approach |      |      | 2016 reallocation approach |      |      | Composite approach |      |      |

|                              | Estimate | Lower bound | Upper bound | Estimate | Lower bound | Upper bound | Estimate | Lower bound | Upper bound |
|------------------------------|----------|-------------|-------------|----------|-------------|-------------|----------|-------------|-------------|
| Global                       | 6.55     | 4.86        | 8.53        | 16.79    | 10.38       | 26.41       | 21.84    | 14.47       | 31.80       |
| High income                  | 3.81     | 2.83        | 4.98        | 11.65    | 7.32        | 18.32       | 12.66    | 8.29        | 18.70       |
| Upper-middle income          | 2.33     | 1.73        | 3.05        | 6.16     | 3.68        | 9.99        | 8.09     | 5.14        | 12.18       |
| Lower-middle income          | 0.92     | 0.68        | 1.21        | 2.26     | 1.35        | 3.61        | 3.07     | 1.88        | 4.69        |
| Low income                   | 0.05     | 0.04        | 0.07        | 0.11     | 0.06        | 0.17        | 0.17     | 0.10        | 0.26        |
| East Asia                    | 1.00     | 0.75        | 1.30        | 2.67     | 1.57        | 4.38        | 3.47     | 2.18        | 5.24        |
| Southeast Asia               | 0.33     | 0.24        | 0.43        | 0.85     | 0.45        | 1.47        | 1.17     | 0.68        | 1.89        |
| Oceania                      | -        | -           | -           | 0.01     | -           | 0.01        | 0.01     | 0.01        | 0.01        |
| Central Asia                 | 0.05     | 0.04        | 0.07        | 0.15     | 0.09        | 0.23        | 0.18     | 0.11        | 0.28        |
| Eastern Europe               | 0.27     | 0.20        | 0.35        | 1.04     | 0.70        | 1.56        | 1.24     | 0.82        | 1.82        |
| Central Europe               | 0.16     | 0.12        | 0.21        | 0.53     | 0.32        | 0.87        | 0.63     | 0.39        | 0.97        |
| Caribbean                    | 0.02     | 0.01        | 0.03        | 0.05     | 0.03        | 0.07        | 0.07     | 0.04        | 0.11        |
| Central Latin America        | 0.19     | 0.14        | 0.25        | 0.47     | 0.28        | 0.76        | 0.66     | 0.41        | 1.01        |
| Tropical Latin America       | 0.23     | 0.17        | 0.30        | 0.52     | 0.31        | 0.83        | 0.76     | 0.52        | 1.08        |
| Andean Latin America         | 0.04     | 0.03        | 0.05        | 0.08     | 0.05        | 0.13        | 0.11     | 0.07        | 0.17        |
| North Africa and Middle East | 0.57     | 0.42        | 0.75        | 1.14     | 0.65        | 1.88        | 1.66     | 1.03        | 2.56        |
| Southern Sub-Saharan Africa  | 0.05     | 0.03        | 0.06        | 0.12     | 0.07        | 0.18        | 0.17     | 0.11        | 0.25        |
| Western Sub-Saharan Africa   | 0.09     | 0.06        | 0.11        | 0.19     | 0.10        | 0.31        | 0.26     | 0.15        | 0.43        |
| Central Sub-Saharan Africa   | 0.02     | 0.01        | 0.03        | 0.04     | 0.02        | 0.06        | 0.06     | 0.04        | 0.09        |
| Eastern Sub-Saharan Africa   | 0.05     | 0.03        | 0.06        | 0.09     | 0.05        | 0.14        | 0.12     | 0.08        | 0.19        |
| South Asia                   | 0.55     | 0.40        | 0.71        | 1.34     | 0.82        | 2.10        | 1.82     | 1.13        | 2.73        |
| Southern Latin America       | 0.09     | 0.07        | 0.12        | 0.22     | 0.14        | 0.35        | 0.28     | 0.19        | 0.40        |
| Western Europe               | 1.42     | 1.04        | 1.86        | 3.83     | 2.29        | 6.27        | 4.27     | 2.76        | 6.39        |

|                           |      |      |      |      |      |      |      |      |      |
|---------------------------|------|------|------|------|------|------|------|------|------|
| High-income North America | 1.53 | 1.14 | 1.99 | 5.20 | 3.46 | 7.80 | 5.55 | 3.74 | 8.00 |
| Australasia               | 0.11 | 0.08 | 0.15 | 0.27 | 0.17 | 0.42 | 0.30 | 0.20 | 0.43 |
| High-income Asia Pacific  | 0.35 | 0.26 | 0.46 | 1.29 | 0.76 | 2.14 | 1.20 | 0.76 | 1.81 |

---

DALY: disability-adjusted life year. GDP: gross domestic product. PPP: purchasing power parity. USD: United States dollar.

**Figure S1. Economic burden of mental disorders, as a percent of GDP, by absolute and relative values per DALY. Values are aggregated by GBD region.**

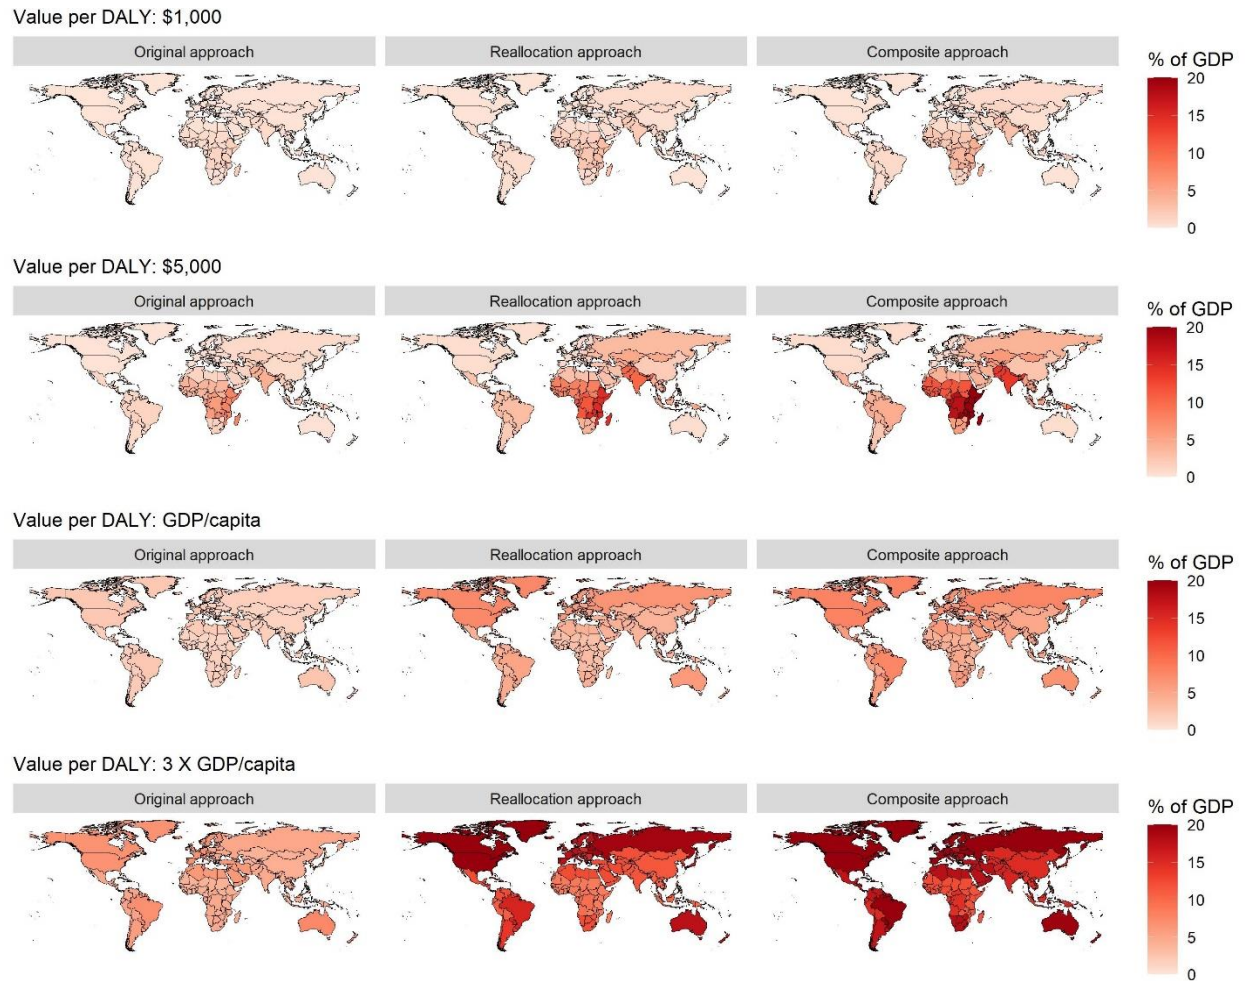

## References

- 1 Bloom DE, Cafiero ET, Jané-Llopis E, *et al.* The Global Economic Burden of Non-communicable Diseases. Geneva, Switzerland: World Economic Forum, 2011  
[http://www3.weforum.org/docs/WEF\\_Harvard\\_HE\\_GlobalEconomicBurdenNonCommunicableDiseases\\_2011.pdf](http://www3.weforum.org/docs/WEF_Harvard_HE_GlobalEconomicBurdenNonCommunicableDiseases_2011.pdf) (accessed March 11, 2019).
- 2 Global Burden of Disease Collaborative Network. Global Burden of Disease Study 2019 (GBD 2019) Cause, Risk, and Location Hierarchies. 2020. DOI:10.6069/Q0YC-CR46.
